# Supplementary material
Source: MDPI journal article supplement (https://www.mdpi.com/1999-4907/12/12/1687)
Supplement: s1 [file s1]

## Supplementary Materials

**Table S1.** Global climate models from the CMIP5 ensemble used in the study Figure 1.

| #  | Research Centre                                                                                                | Country   | Global climate model |
|----|----------------------------------------------------------------------------------------------------------------|-----------|----------------------|
| 1  | The Centre for Australian Weather and Climate Research                                                         | Australia | ACCESS1-0            |
| 2  | The Centre for Australian Weather and Climate Research                                                         | Australia | ACCESS1-3            |
| 3  | Canadian Centre for Climate Modelling and Analysis                                                             | Canada    | CanESM2,             |
| 4  | National Centre for Atmospheric Research                                                                       | USA       | NCAR-CESM1-CAM5      |
| 5  | CNRM-GAME & Cerfacs                                                                                            | France    | CNRM-CM5             |
| 6  | Australia's Commonwealth Scientific and Industrial Research Organisation                                       | Australia | CSIRO-MK36           |
| 7  | Geophysical Fluid Dynamics Laboratory                                                                          | USA       | GFDL-CM3             |
| 8  | Geophysical Fluid Dynamics Laboratory                                                                          | USA       | GFDL-ESM2G           |
| 9  | Geophysical Fluid Dynamics Laboratory                                                                          | USA       | GFDL-ESM2M           |
| 10 | Goddard Institute for Space Studies                                                                            | USA       | GISS-E2-H            |
| 11 | Goddard Institute for Space Studies                                                                            | USA       | GISS-E2-H-CC         |
| 12 | Goddard Institute for Space Studies                                                                            | USA       | GISS-E2-R            |
| 13 | Goddard Institute for Space Studies                                                                            | USA       | GISS-E2-R-CC         |
| 14 | UK Meteorological Office                                                                                       | UK        | HadGEM2-AO           |
| 15 | UK Meteorological Office                                                                                       | UK        | HadGEM2-CC           |
| 16 | UK Meteorological Office                                                                                       | UK        | HadGEM2-ES           |
| 17 | Institute Pierre Simon Laplace                                                                                 | France    | IPSL-CM5A-MR         |
| 18 | Institute Pierre Simon Laplace                                                                                 | France    | IPSL-CM5B-LR         |
| 19 | Institute Pierre Simon Laplace                                                                                 | France    | IPSL-CM5A-LR         |
| 20 | University of Tokyo, National Institute for Envir. Studies, Japan Agency for Marine-Earth Science & Technology | Japan     | MIROC-ESM            |
| 21 | University of Tokyo, National Institute for Envir. Studies, Japan Agency for Marine-Earth Science & Technology | Japan     | MIROC-ESM-CHEM       |
| 22 | University of Tokyo, National Institute for Envir. Studies, Japan Agency for Marine-Earth Science & Technology | Japan     | MIROC5               |
| 23 | Max-Planck Institute for Meteorology                                                                           | Germany   | MPI-ESM-LR           |
| 24 | Max-Planck Institute for Meteorology                                                                           | Germany   | MPI-ESM-MR           |
| 25 | Meteorological Research Institute                                                                              | Japan     | MRI-CGCM3            |
| 26 | Meteorological Research Institute                                                                              | Japan     | MRI-ESML             |
| 27 | Norwegian Climate Centre                                                                                       | Norway    | NorESM1-M            |

**Table S2.** Classification matrix of observed and predicted values for spruce suitability in the number of pixels (0-unsuitable, 1-suitable)

| Predicted |   | 0     | 1     | Sum   |
|-----------|---|-------|-------|-------|
| Observed  | 0 | 15063 | 600   | 15663 |
|           | 1 | 781   | 12765 | 13546 |
| Sum       |   | 15844 | 13365 | 29209 |

**Table S3.** Classification matrix of observed and predicted values for spruce suitability in percentage (0-unsuitable, 1-suitable)

| Predicted |   | 0       | 1      | Sum  |
|-----------|---|---------|--------|------|
| Observed  | 0 | 96.17%  | 3.83%  | 100% |
|           | 1 | 5.77%   | 94.33% | 100% |
| Sum       |   | 101.94% | 98.16% |      |
